# Supplementary material for: γ irradiation induced effects on bismuth active centres and related photoluminescence properties of Bi/Er co-doped optical fibres
Source: PubMed Central journal article supplement (PMC4954960; doi:10.1038/srep29827), 2016-07-21
Supplement: srep29827-s1.pdf [file srep29827-s1.pdf]

# $\gamma$ irradiation induced effects on bismuth active centres and related photoluminescence properties of Bi/Er co-doped optical fibers

D. Sporea<sup>1\*</sup>, L. Mihai<sup>1</sup>, D. Neguț<sup>2</sup>, Yanhua Luo<sup>3</sup>, Binbin Yan<sup>3,4</sup>, Mingjie Ding<sup>3</sup>, Shuen Wei<sup>3</sup>, Gang-Ding Peng<sup>3</sup>

<sup>1</sup>National Institute for Laser, Plasma and Radiation Physics, Laser Metrology Laboratory, Măgurele, RO-077125, Romania

<sup>2</sup>”Horia Hulubei” National Institute of Physics and Nuclear Engineering, IRASM, RO-077125, Măgurele, Romania

<sup>3</sup>Photonics & Optical Communications, School of Electrical Engineering & Telecommunications, University of New South Wales, Sydney, NSW 2052, Australia

<sup>4</sup>State Key Laboratory of Information Photonics and Optical Communications, Beijing University of Posts and Telecommunications, Beijing 100876, China

\*dan.sporea@inflpr.ro

## Supplementary materials

| Sample                         | SA1                          | SA2                  | SA3  | SA4  | SA5  |      |      |
|--------------------------------|------------------------------|----------------------|------|------|------|------|------|
| Length of the BEDF (cm)        | 30.5                         | 31.6                 | 30.5 | 31.0 | 31.0 |      |      |
| Dose (kGy)                     | 1                            | 5                    | 15   | 30   | 50   |      |      |
|                                | Measured parameter           | Measuring conditions |      |      |      |      |      |
| <b>Small signal absorption</b> | $\alpha@1300$ nm (dB)        | Before irradiation   | 17.8 | 10.9 | 10.8 | 10.6 | 11.4 |
|                                | $\alpha@1300$ nm (dB)        | After irradiation    | 16.5 | 9.1  | 10.4 | 9.8  | 10.3 |
| <b>Pump absorption</b>         | $\alpha_{max}@830$ nm (dB/m) | Before irradiation   | 58.4 | 55.0 | 56.4 | 53.1 | 52.2 |
|                                | $\alpha_s@830$ nm (dB/m)     |                      | 45.3 | 41.2 | 40.0 | 36.1 | 32.8 |
|                                | $\alpha_{us}@830$ nm (dB/m)  |                      | 13.2 | 13.8 | 16.4 | 17.0 | 19.4 |

|  |                                   |                      |      |      |      |      |      |
|--|-----------------------------------|----------------------|------|------|------|------|------|
|  | $\alpha_{\max}$ @830<br>nm (dB/m) | After<br>irradiation | 72.5 | 71.3 | 77.2 | 86.9 | 91.0 |
|  | $\alpha_s$ @830 nm<br>(dB/m)      |                      | 51.0 | 41.2 | 40.4 | 44.5 | 46.1 |
|  | $\alpha_{us}$ @830<br>nm (dB/m)   |                      | 21.5 | 30.1 | 36.7 | 42.3 | 44.9 |

**Supplementary Table S1.** The values of the attenuation related parameters measured before and after gamma irradiation.

| Sample                      |                                      | SA1                   | SA2 | SA3 | SA4 | SA5 |   |
|-----------------------------|--------------------------------------|-----------------------|-----|-----|-----|-----|---|
| <b>Forward<br/>emission</b> | $e_2(\lambda)$ at maximum<br>pumping | Before<br>irradiation | √   | √   | √   | √   | √ |
|                             |                                      | After<br>irradiation  | √   | √   | √   | √   | √ |
|                             | $e_2(1410)/e_2(1540)$                | Before<br>irradiation | √   | √   | √   | √   | √ |
|                             |                                      | After<br>irradiation  | √   | √   | √   | √   | √ |
|                             |                                      | Variation             | √   | √   | √   | √   | √ |
|                             | $e_2(1100)/e_2(1540)$                | Before<br>irradiation | √   | √   | √   | √   | √ |
|                             |                                      | After<br>irradiation  | √   | √   | √   | √   | √ |
|                             |                                      | Variation             | √   | √   | √   | √   | √ |
|                             | $e_2(1100)/e_2(1410)$                | Before<br>irradiation | √   | √   | √   | √   | √ |

|                                                    |                                                               |                    |   |   |   |   |   |
|----------------------------------------------------|---------------------------------------------------------------|--------------------|---|---|---|---|---|
|                                                    |                                                               | After irradiation  | √ | √ | √ | √ | √ |
|                                                    |                                                               | Variation          | √ | √ | √ | √ | √ |
|                                                    | $e_2(\lambda)$ at different pump power                        | Before irradiation | √ | √ | √ | √ | √ |
|                                                    |                                                               | After irradiation  | √ | √ | √ | √ | √ |
| <b>Emission under different pumping conditions</b> | $e_2(1410)$ vs pump power                                     | Before irradiation | √ | √ | √ | √ | √ |
|                                                    |                                                               | After irradiation  | √ | √ | √ | √ | √ |
|                                                    | $P_{\text{sat}}$                                              | Before irradiation | √ | √ | √ | √ | √ |
|                                                    |                                                               | After irradiation  | √ | √ | √ | √ | √ |
|                                                    | $P_{\text{sat}}(\text{after})/ P_{\text{sat}}(\text{before})$ | Variation          | √ | √ | √ | √ | √ |

**Supplementary Table S2.** Emission related tests performed pre and post gamma irradiation.

| Measurement conditions             | Sample     | Sample     | Sample     |
|------------------------------------|------------|------------|------------|
|                                    | Dose (kGy) | Dose (kGy) | Dose (kGy) |
|                                    | SA2        | SA3        | SA5        |
|                                    | 5 kGy      | 15 kGy     | 50 kGy     |
| Pump power before irradiation (mW) | 27.3       | 30.7       | 44.1       |
| Pump power after irradiation (mW)  | 29.1       | 35.7       | 44.1       |

**Supplementary Table S3.** The pump power for emission tests - before and after the 5 kGy, 15 kGy, 50 kGy dose irradiations.

| Sample name | Sample constituents                                | Total irradiation dose (kGy) |
|-------------|----------------------------------------------------|------------------------------|
| SA-1        | SMF@1300 (1.2 m) + BEDF (30.5 cm) + SMF@1550 (2 m) | 1                            |
| SA-2        | SMF@1300 (1.2 m) + BEDF (30 cm) + SMF@1550 (2 m)   | 5                            |
| SA-3        | SMF@1300 (1.2 m) + BEDF (31.6 cm) + SMF@1550 (2 m) | 15                           |
| SA-4        | SMF@1300 (1.2 m) + BEDF (30 cm) + SMF@1550 (2 m)   | 30                           |
| SA-5        | SMF@1300 (1.2 m) + BEDF (30.5 cm) + SMF@1550 (2 m) | 50                           |

**Supplementary Table S4.** The investigated samples and the irradiation conditions.

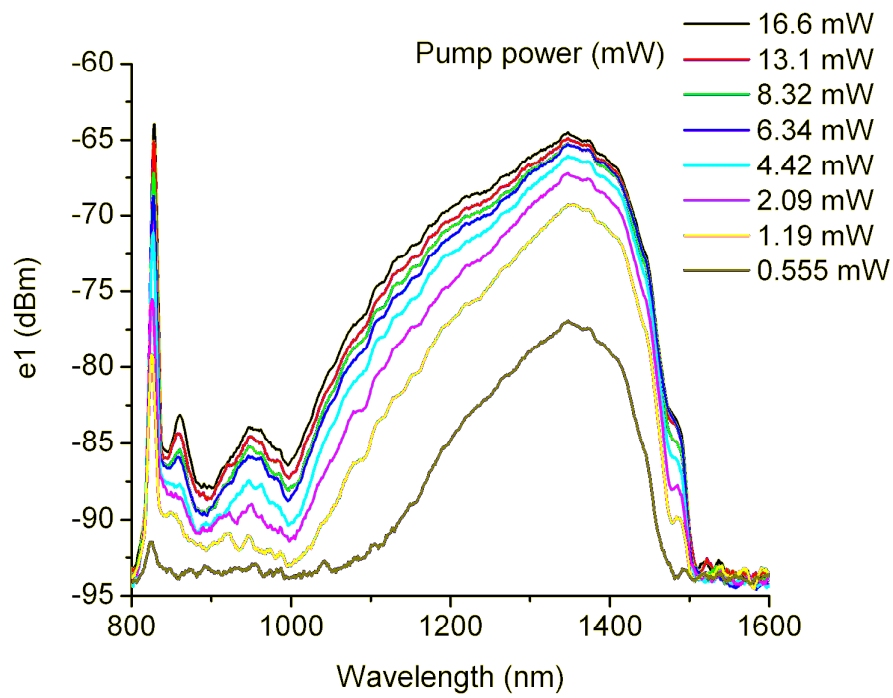

a

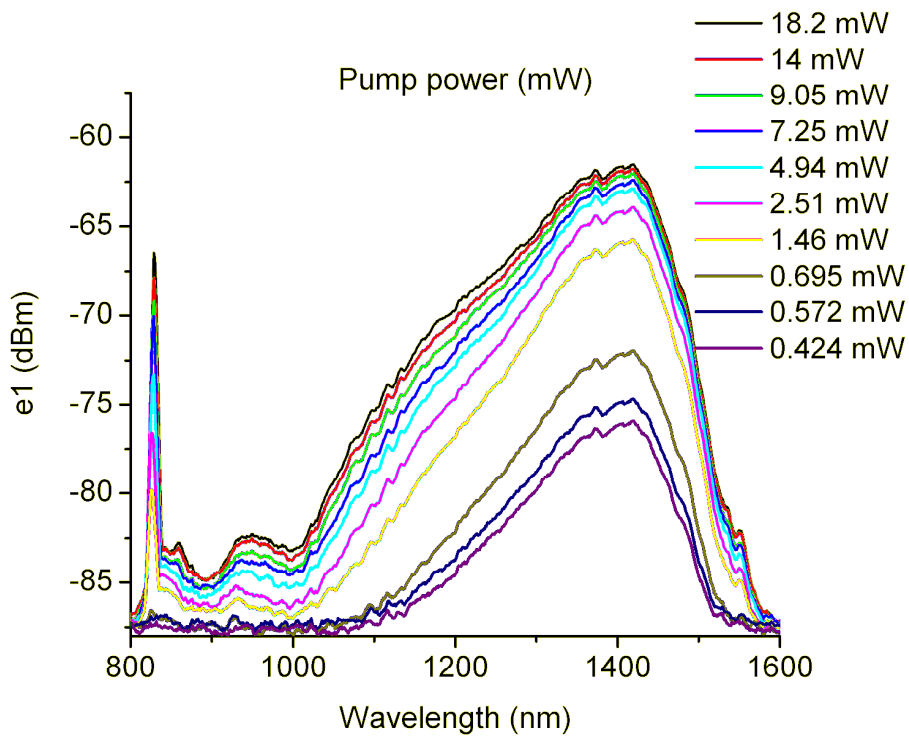

b

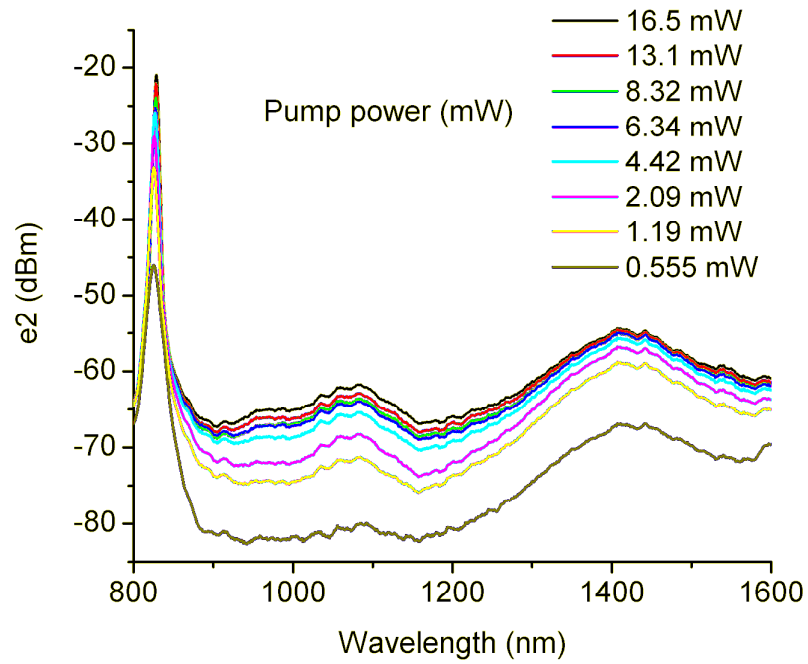

c

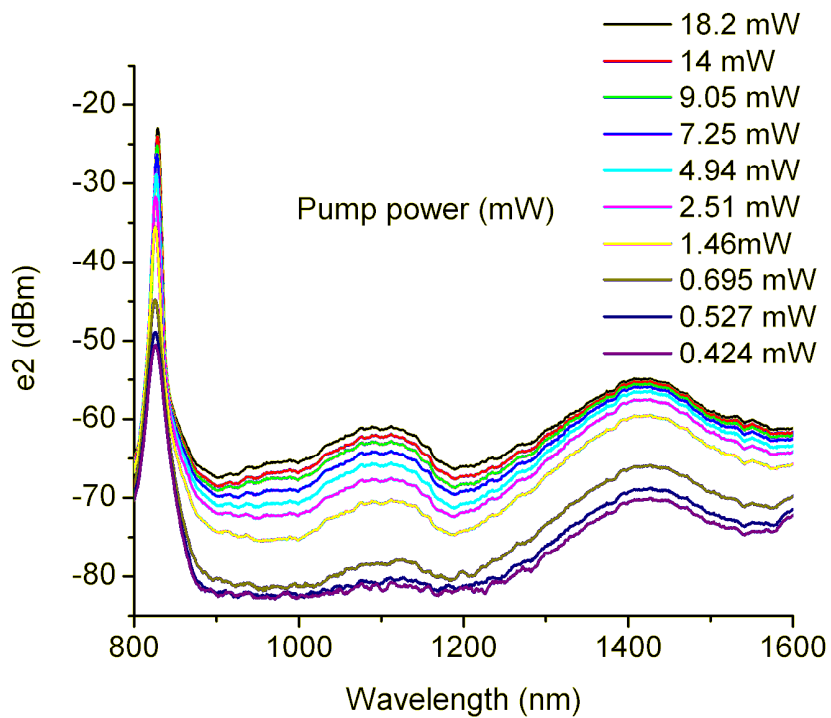

d

**Supplementary Figure S1.** The dependence on the pump power of: the backward  $e_1(\lambda)$  propagated spectral emission for sample SA1 before (a) and after (b) 1 kGy gamma irradiation; the forward  $e_2(\lambda)$  propagated spectral emission for sample SA1 before (c) and after (d) 1 kGy gamma irradiation, pump power at 830 nm.

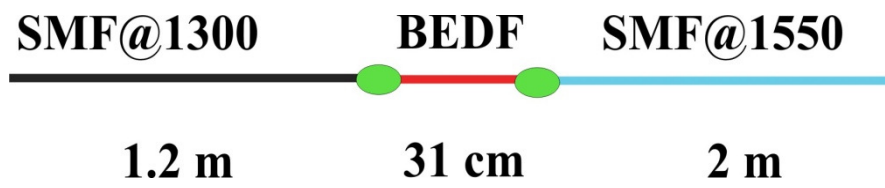

**Supplementary Figure S2.** The sketch of the SA optical fiber sample.

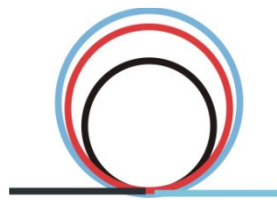

**Supplementary Figure S3.** The sample geometry during the irradiation

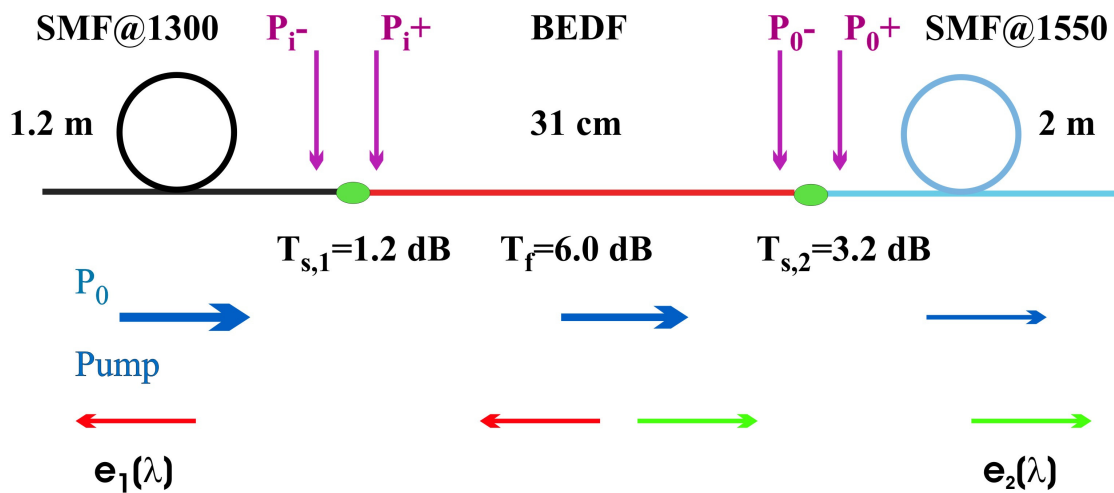

**Supplementary Figure S4.** The optical power measuring points for the spectral emission of the tested sample SA5 (50 kGy), used for investigations done before and after the irradiation:  $P_0$  – the pump power;  $P_{i-}$  – the optical power at the input of the splicer coupling the SMF@1300 to BEDF;  $P_{i+}$  – the optical power at the output of the splicer coupling the SMF@1300 to BEDF;  $P_{0-}$  – the optical power at the input of the splicer coupling the BEDF to the SMF@1550;  $P_{0+}$  – the optical power at the output of the splicer coupling the BEDF to the SMF@1550;  $T_{s,1}$  – transmission losses in the splicer coupling the SMF@1300 to the BEDF;  $T_{s,2}$  – transmission losses in the splicer coupling the BEDF to the SMF@1550;  $T_f$  – transmission losses in the BEDF.

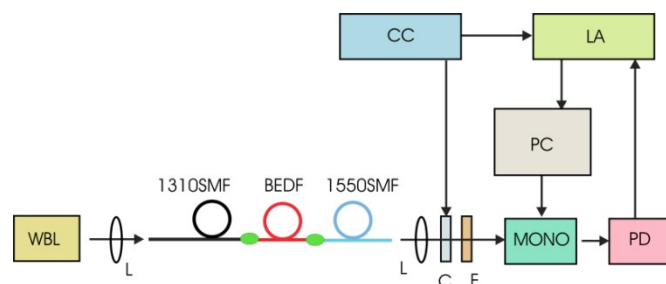

**Supplementary Figure S5.** The setup for spectral attenuation evaluation: WBL – wide band lamp; L – lens; F – filter; C – copper; CC – chopper controller; LA – lock-in amplifier; MONO – monochromator; PD – photodiode; PC – desk top computer.



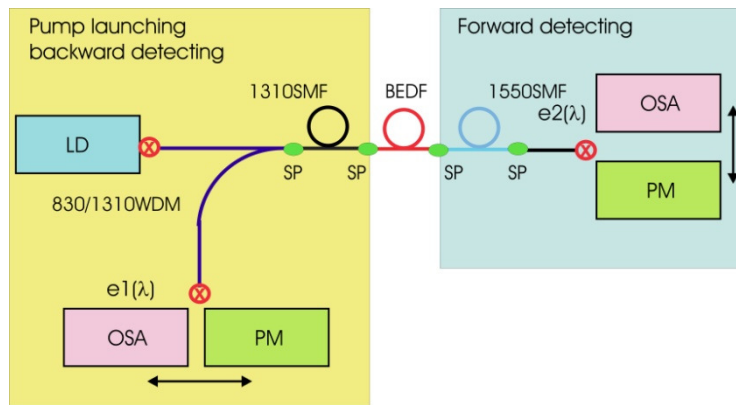

**Supplementary Figure S6.** The setup for spectral emission measurements: LD – laser diode; OSA – optical spectrum analyser; PM – power meter; SP – splice.
